# Supplementary material for: Data Independent Acquisition Reveals In-Depth Serum Proteome Changes in Canine Leishmaniosis
Source: MDPI journal article supplement (doi:10.3390/metabo13030365), 2023-02-28
Supplement: s1 [file s1]

**Supplementary Table S1.** Diagnostic methods for determination of *Leishmania* infection in selected canine serum samples. The infection of *Leishmania infantum* was diagnosed using three serological tests: indirect fluorescence antibody test (IFAT), enzyme-linked immunosorbent assay (ELISA) and kinesin-related conserved recombinant antigen (rK39 rapid immunochromatographic test evaluating the presence of anti-*Leishmania* antibody).

| Sample | Animal data                                   | Diagnostic method |       |          |
|--------|-----------------------------------------------|-------------------|-------|----------|
|        |                                               | IFAT              | ELISA | Other    |
| 2274   | Dogo argentino, 2.5y., m., VEGAS              | 1/1280<br>pos     | pos   | rK39 (+) |
| 2282   | staffordshire terrier, 3y., m., DE SIMBA      | 1/640<br>pos      | pos   | rK39 (+) |
| 2287   | mixed breed, 2.5y., m., DŽAT                  | 1/640<br>pos      | pos   | rK39 (+) |
| 2304   | german shepherd, 9y., m., MAX                 | 1/640<br>pos      | pos   | rK39 (+) |
| 2315   | german shepherd, 2y., m., TIMBO               | 1/2560<br>pos     | pos   | rK39 (+) |
| 2289   | mixed breed, 2y., m., GARO                    | 1/40<br>neg       | neg   | rK39 (-) |
| 2303   | american staffordshire terrier, 8y., m., BUBI | 1/40<br>neg       | neg   | rK39 (-) |
| 2311   | mixed breed, 4y., f., BETTY                   | 1/40<br>neg       | neg   | rK39 (-) |
| 2317   | mixed breed, 5y, m., ŽUĆO                     | 1/40<br>neg       | neg   | rK39 (-) |
| 2318   | mixed breed, 6y., f., BELA                    | 1/40<br>neg       | neg   | rK39 (-) |
